# Supplementary material for: Reactive Oxygen Species Alleviate Cell Death Induced by Thaxtomin A in Arabidopsis thaliana Cell Cultures
Source: MDPI journal article supplement (doi:10.3390/plants8090332), 2019-09-06
Supplement: s1 [file s1]

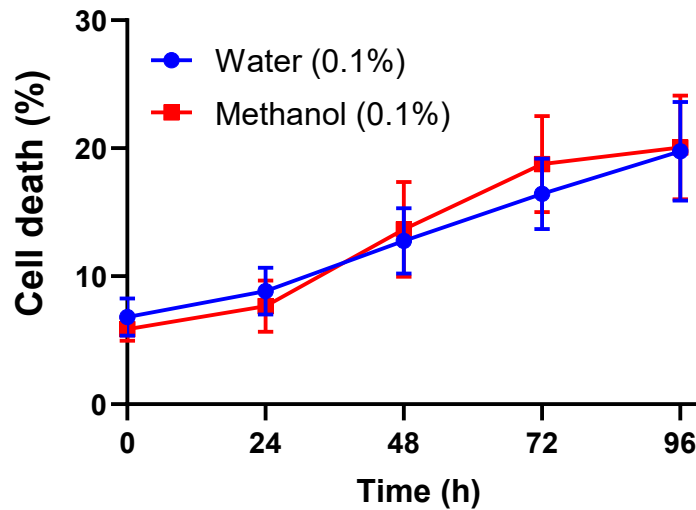

**Figure S1. Effect of 0.1% methanol on *Arabidopsis thaliana* cell suspensions viability.**

Percentage of cell death in *A. thaliana* cell suspensions treated with water (0.1% final volume) or methanol (0.1% final volume) over a period of 96 hours. Cells were counted in groups of 500. The mean  $\pm$  SD was calculated from 3 replicates for each time point.

Data was analyzed using t-test followed by Holm-Šidák method with  $\alpha = 0.05$ .

No significant difference ( $p < 0.05$ ) was found for each time point.
