# Supplementary material for: Reactive Oxygen Species Alleviate Cell Death Induced by Thaxtomin A in Arabidopsis thaliana Cell Cultures
Source: MDPI journal article supplement (doi:10.3390/plants8090332), 2019-09-06
Supplement: s1 [file s1]

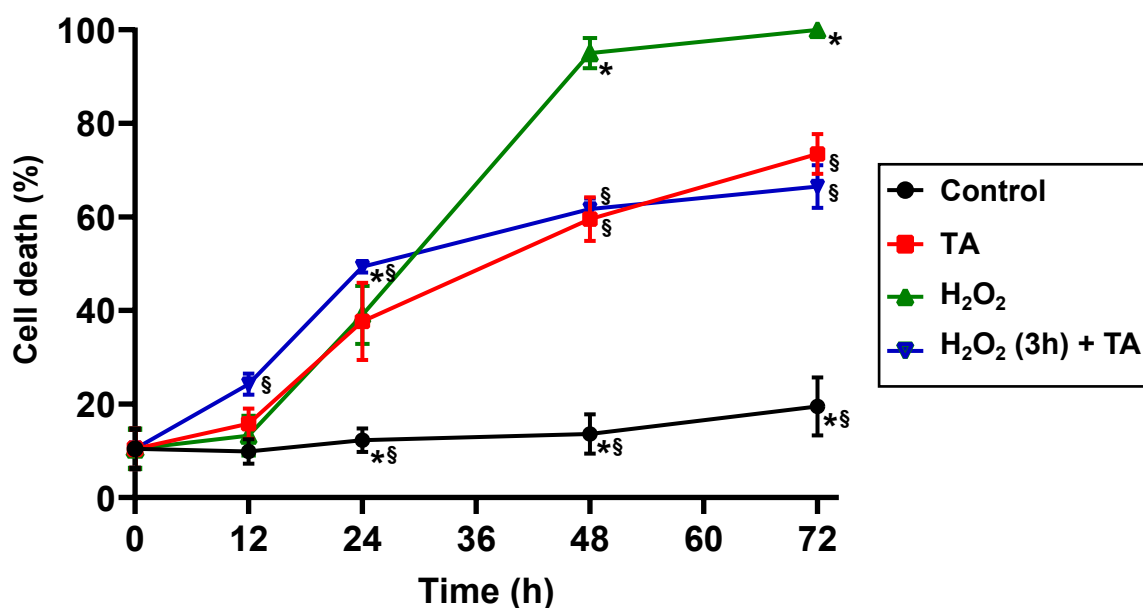

**Figure S2. Induction of cell death in response to thaxtomin A, H<sub>2</sub>O<sub>2</sub>, and a combination of both.**

Percentage of cell death in *A. thaliana* cell suspensions at different time points after treatment with 0.1% methanol (Control), 1  $\mu$ M thaxtomin A (TA), 10 mM H<sub>2</sub>O<sub>2</sub> (H<sub>2</sub>O<sub>2</sub>), or with a pretreatment of 10 mM H<sub>2</sub>O<sub>2</sub> for 3 hours (3h) before adding 1  $\mu$ M TA. Cells were counted in groups of 100 for a total of 500 cells per experiment. The mean  $\pm$  SD was calculated from at least 3 experimental replicates for each time point. Data was analyzed using one-way ANOVA. For each time point, a significant difference with TA treatment is indicated by (\*) and a significant difference with H<sub>2</sub>O<sub>2</sub> treatment is indicated by (§) ( $p < 0.05$ ).
